# Supplementary material for: Controllable Electrochromic Polyamide Film and Device Produced by Facile Ultrasonic Spray-coating
Source: PubMed Central journal article supplement (PMC5607338; doi:10.1038/s41598-017-11862-1), 2017-09-20
Supplement: 41598_2017_11862_MOESM1_ESM.pdf [file 41598_2017_11862_MOESM1_ESM.pdf]

# Supplementary Information

## **Controllable Electrochromic Polyamide Film and Device Produced by Facile Ultrasonic Spray-coating**

**Huan-Shen Liu<sup>1,+</sup>, Wei-Chieh Chang<sup>2,+</sup>, Chin-Yen Chou<sup>1</sup>, Bo-Cheng Pan<sup>1</sup>, Yi-Shan Chou<sup>2</sup>, Guey-Sheng Liou<sup>1,\*</sup>, and Cheng-Liang Liu<sup>2,\*</sup>**

<sup>1</sup>Institute of Polymer Science and Engineering, National Taiwan University, Taipei, 10617 Taiwan

<sup>2</sup>Department of Chemical and Materials Engineering, National Central University, Taoyuan, 32001 Taiwan

\*gsliau@ntu.edu.tw; clliu@ncu.edu.tw

+These authors contributed equally to this work

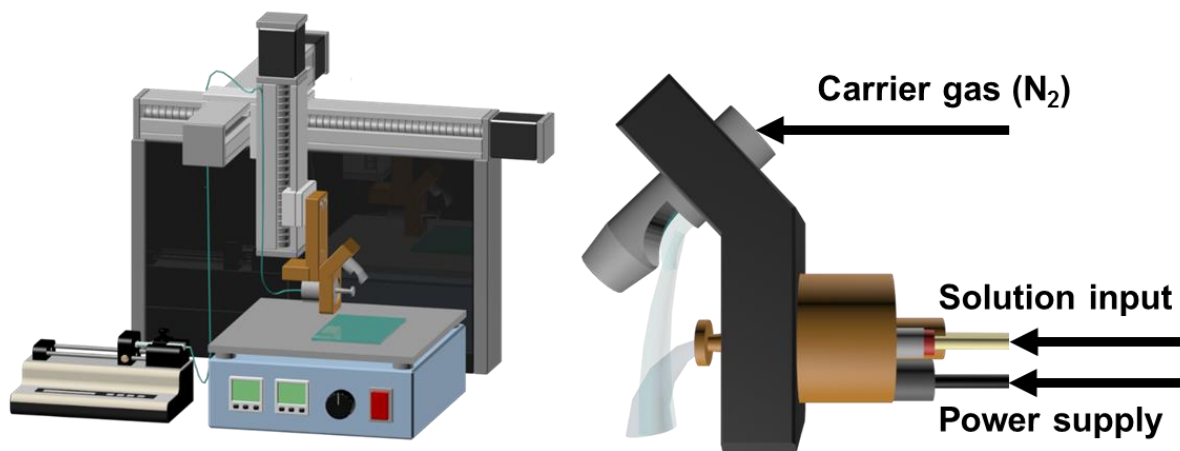

**Figure S1.** Schematic representation of setup for ultrasonic spray-coating of electrochromic polymer thin film.

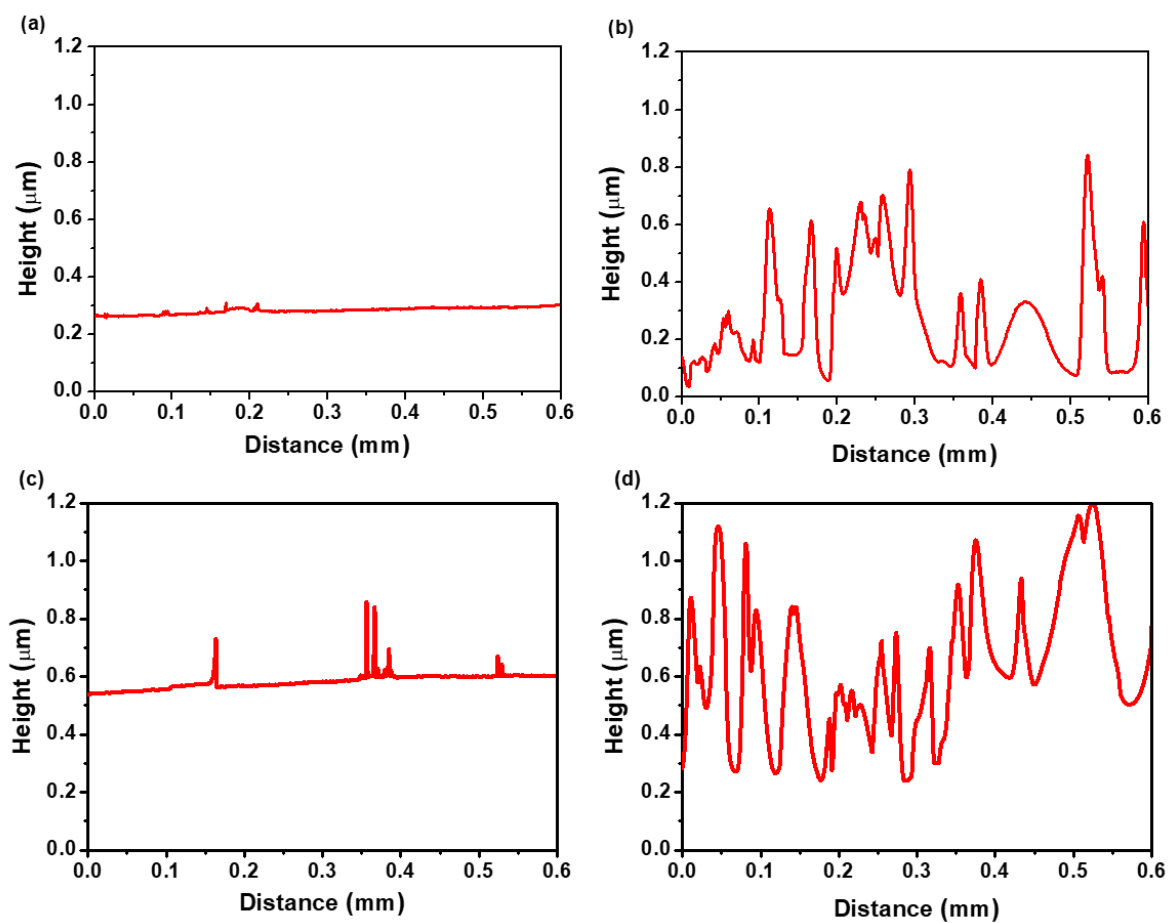

**Figure S2.** Surface height line scans of ultrasonic spray-coated (a) **Film A**, (b) **Film B**, (c) **Film C** and (d) **Film D**, measured by profilometry over a lateral distance of 0.6 mm.

(a)

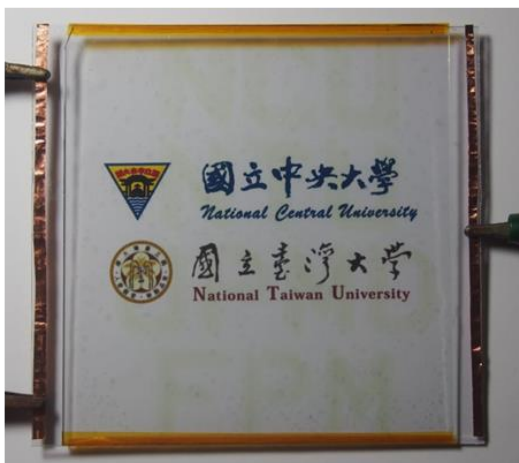

(b)

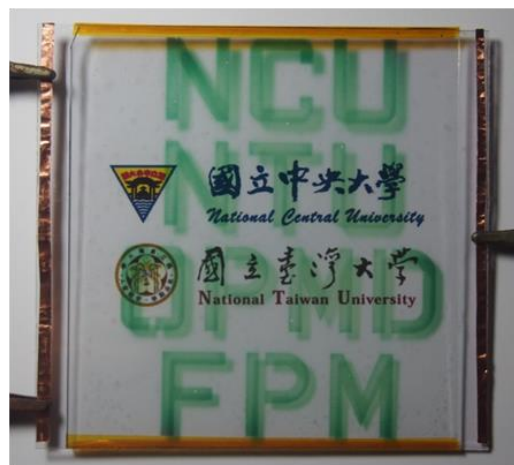

**Figure S3.** Photograph of the pattern TPA-OMD polyamide ECD in the (a) neutral state and (b) oxidized state.
